# Supplementary material
Source: PubMed Central journal article supplement (PMC6202193)
Supplement: NIHMS978411-supplement-pdf.pdf [file NIHMS978411-supplement-pdf.pdf]

**SUPPLEMENTAL MATERIAL**

| <b>Item</b> | <b>Description</b>                                                                                                                                                      | <b>Page</b> |
|-------------|-------------------------------------------------------------------------------------------------------------------------------------------------------------------------|-------------|
| Table 1     | Definition of exposures, covariates and outcomes                                                                                                                        | 2           |
| Table 2     | Baseline characteristics in the prognostic score matched cohorts                                                                                                        | 5           |
| Table 3     | Baseline characteristics of the warfarin group in the study years 2010-2012 and 2013-2015 (prognostic score matched warfarin cohort for the “death” outcome)            | 7           |
| Table 4     | Event rates in the warfarin group in the study years 2010-2012 and 2013-2015 (in prognostic score matched cohorts)                                                      | 9           |
| Table 5     | Comparison of unmatched apixaban and warfarin groups based on multivariate Cox regression model including anticoagulant drug exposure as one of the predictor variables | 10          |
| Table 6     | Sensitivity analysis excluding apixaban patients who were originally prescribed warfarin and then switched to apixaban                                                  | 11          |
| Table 7     | Results of subgroup analyses in matched apixaban and warfarin cohorts                                                                                                   | 12          |
| Table 8     | Baseline characteristics of patients prescribed apixaban 5 mg and apixaban 2.5 mg doses                                                                                 | 14          |
| Table 9     | Event rates in the matched dose-specific apixaban and warfarin cohorts                                                                                                  | 16          |
| Table 10    | Multivariate Cox regression analyses restricted to the apixaban patients and including the apixaban dose as a predictor variable                                        | 17          |
| Figure 1    | Flowchart of the cohort creation                                                                                                                                        | 18          |
| Figure 2    | Distribution of prognostic scores for each outcome in the apixaban and warfarin cohorts before and after matching                                                       | 19          |
| References  |                                                                                                                                                                         | 22          |

**Table 1.** Definition of exposures, covariates and outcomes

| <b>Diagnoses</b>                                               | <b>ICD-9-CM codes</b>                                                                                                                                                                                                                                                                                                                                                                                                                                                                                                                                                                                                                                                                                                                                                                                                                                                                                                                         | <b>ICD-10-CM codes</b>                                                                                                                                                                                                                                                                                                                                                                                                                                                                                                                                                                                                                                                                                                                                     |
|----------------------------------------------------------------|-----------------------------------------------------------------------------------------------------------------------------------------------------------------------------------------------------------------------------------------------------------------------------------------------------------------------------------------------------------------------------------------------------------------------------------------------------------------------------------------------------------------------------------------------------------------------------------------------------------------------------------------------------------------------------------------------------------------------------------------------------------------------------------------------------------------------------------------------------------------------------------------------------------------------------------------------|------------------------------------------------------------------------------------------------------------------------------------------------------------------------------------------------------------------------------------------------------------------------------------------------------------------------------------------------------------------------------------------------------------------------------------------------------------------------------------------------------------------------------------------------------------------------------------------------------------------------------------------------------------------------------------------------------------------------------------------------------------|
| Atrial fibrillation/flutter                                    | 427.3 (includes 427.31 and 427.32)                                                                                                                                                                                                                                                                                                                                                                                                                                                                                                                                                                                                                                                                                                                                                                                                                                                                                                            | I48.91, I48.92                                                                                                                                                                                                                                                                                                                                                                                                                                                                                                                                                                                                                                                                                                                                             |
| Mitral stenosis; history of valve surgery (exclusion criteria) | 394.0, 394.2, 396.0, 396.1, 396.8, 746.5, V43.3                                                                                                                                                                                                                                                                                                                                                                                                                                                                                                                                                                                                                                                                                                                                                                                                                                                                                               | I05.0, I05.8, I05.9, I08.0, I34.2, Z95.2, Z95.4                                                                                                                                                                                                                                                                                                                                                                                                                                                                                                                                                                                                                                                                                                            |
| Ischemic stroke                                                | 433.x1, 434.x (except subcode: x0), 436                                                                                                                                                                                                                                                                                                                                                                                                                                                                                                                                                                                                                                                                                                                                                                                                                                                                                                       |                                                                                                                                                                                                                                                                                                                                                                                                                                                                                                                                                                                                                                                                                                                                                            |
| Systemic embolism                                              | 444.x                                                                                                                                                                                                                                                                                                                                                                                                                                                                                                                                                                                                                                                                                                                                                                                                                                                                                                                                         | I74.x                                                                                                                                                                                                                                                                                                                                                                                                                                                                                                                                                                                                                                                                                                                                                      |
| Major bleeding                                                 | <p>Major bleeding is defined as a bleeding event with<br/>                     (i) a critical site code (intracranial, retroperitoneal, intraspinal, intra-ocular, pericardial, or intraarticular),<br/>                     (ii) a transfusion of blood products,<br/>                     or (iii) death,<br/>                     as described in Cunningham et al.</p> <p>Critical site code: 430, 431, 432, 363.6, 376.32, 377.42, 379.23, 719.1, 729.92, 423.0, 800.2x, 800.3x, 800.7x, 800.8x, 801.2x, 801.3x, 801.7x, 801.8x, 803.2x, 803.3x, 803.7x, 803.8x, 804.2x, 804.3x, 804.7x, 804.8x, 852.x, 853.x</p> <p>Transfusion: a) ICD-9 PRC: 99.02, 99.03, 99.04, 99.05, 99.06, 99.07, 99.08, b) CPT 36430, c) HCPC: P9010, P9011, P9012, P9016, P9017, P9019, P9020, P9021, P9022, P9023, P9031-P9040, P9043, P9044, P9051 – P9060, P9070-P9072, d) Revenue Center Codes: 0380-0392, 0399, e) Additional Value Codes: 37, 38, 39</p> | <p>Major bleeding is defined as a bleeding event with<br/>                     (i) a critical site code (intracranial, retroperitoneal, intraspinal, intra-ocular, pericardial, or intraarticular),<br/>                     (ii) a transfusion of blood products,<br/>                     or (iii) death,<br/>                     as described in Cunningham et al.</p> <p>Critical site code: I60.x, I61.x, I62.x, H31.309, H05.239, H47.029, H43.1x, M79.81, M25.00</p> <p>Transfusion: PCS: 3023, 3024, 3028, b) CPT 36430, c) HCPC P9010, P9011, P9012, P9016, P9017, P9019, P9020, P9021, P9022, P9023, P9031-P9040, P9043, P9044, P9051 – P9060, P9070-P9072, d) Revenue Center Codes: 0380-0392, 0399, e) Additional Value Codes: 37, 38, 39</p> |
| Gastrointestinal bleeding                                      | 531.0x, 531.2x, 531.4x, 531.6x, 532.0x, 532.2x, 532.4x, 532.6x, 533.0x, 533.2x, 533.4x, 533.6x, 534.0x, 534.2x, 534.4x, 534.6x, 535.01, 535.11, 535.21, 535.31, 535.41, 535.51, 535.61, 535.71, 537.83, 537.84, 456.0, 456.20,                                                                                                                                                                                                                                                                                                                                                                                                                                                                                                                                                                                                                                                                                                                | K92.0, K92.1, K92.2, K29.01, K62.5, K31.811, K31.82, K57.01, K57.11, K57.13, K57.21, K57.31, K57.33, K57.41, K57.51, K57.53, K57.81, K57.91, K57.93, K29.x1, K22.11, K25.0, K25.2,                                                                                                                                                                                                                                                                                                                                                                                                                                                                                                                                                                         |

|                                        |                                                                                                                                                                                                                                                                   |                                                                                                                                                                                                                                                                                                                                                                                                                                                                                                                                                                                                                                                                                                                                                                                                                |
|----------------------------------------|-------------------------------------------------------------------------------------------------------------------------------------------------------------------------------------------------------------------------------------------------------------------|----------------------------------------------------------------------------------------------------------------------------------------------------------------------------------------------------------------------------------------------------------------------------------------------------------------------------------------------------------------------------------------------------------------------------------------------------------------------------------------------------------------------------------------------------------------------------------------------------------------------------------------------------------------------------------------------------------------------------------------------------------------------------------------------------------------|
|                                        | 530.21, 530.7, 530.82, 578.0, 562.02, 562.03, 562.12, 562.13, 569.3, 569.85, 578.x                                                                                                                                                                                | K25.4, K25.6, K26.0, K26.2, K26.4, K26.6, K27.0, K27.2, K27.4, K27.6, K28.0, K28.2, K28.4, K28.6, K55.21                                                                                                                                                                                                                                                                                                                                                                                                                                                                                                                                                                                                                                                                                                       |
| Intracranial bleed                     | 430, 431, 432, 800.2x, 800.3x, 800.7x, 800.8x, 801.2x, 801.3x, 801.7x, 801.8x, 803.2x, 803.3x, 803.7x, 803.8x, 804.2x, 804.3x, 804.7x, 804.8x, 852.x, 853.x                                                                                                       | I60.x, I61.x, I62.x                                                                                                                                                                                                                                                                                                                                                                                                                                                                                                                                                                                                                                                                                                                                                                                            |
| Death                                  | USRDS collects death information from several sources, including the CMS Medicare EDB, CMS forms 2746 and 2728, the OPTN transplant follow-up form, CROWNWeb database, inpatient claims, and, where allowed by regulation, the Social Security Death Master File. |                                                                                                                                                                                                                                                                                                                                                                                                                                                                                                                                                                                                                                                                                                                                                                                                                |
|                                        |                                                                                                                                                                                                                                                                   |                                                                                                                                                                                                                                                                                                                                                                                                                                                                                                                                                                                                                                                                                                                                                                                                                |
| <b>Procedures</b>                      | <b>ICD-9-CM codes</b>                                                                                                                                                                                                                                             | <b>ICD-10-PCS codes</b>                                                                                                                                                                                                                                                                                                                                                                                                                                                                                                                                                                                                                                                                                                                                                                                        |
| Any valve surgery (exclusion criteria) | 35.00, 35.01, 35.02, 35.03, 35.04, 35.10, 35.11, 35.12, 35.13, 35.14, 35.20, 35.21, 35.22, 35.23, 35.24, 35.25, 35.26, 35.27, 35.28, 35.96, 35.99, 35.0x, 35.1x, 35.2x                                                                                            | 02RF37Z, 02RF38Z, 02RF3JZ, 02RF3KZ, 02RH37Z, 02RH38Z, 02RH3JZ, 02RH3KZ, 027F0ZZ, 02NF0ZZ, 02QF0ZZ, 027G0ZZ, 02NG0ZZ, 02QG0ZZ, 02QF0ZZ, 02QF3ZZ, 02QF4ZZ, 027H0ZZ, 02NH0ZZ, 02QH0ZZ, 02QH3ZZ, 02QH4ZZ, 027J0ZZ, 02NJ0ZZ, 02QJ0ZZ, 02QJ3ZZ, 02QJ4ZZ, 02RF07Z, 02RF08Z, 02RF0KZ, 02RF0JZ, 02RG07Z, 02RG08Z, 02RG0KZ, 02RG0JZ, 02RH07Z, 02RH08Z, 02RH0KZ, 02RH0JZ, 02RJ07Z, 02RJ08Z, 02RJ0KZ, 02RJ0JZ, 02UF0JZ, 02UF07Z, 02UF0KZ, 02UF47Z, 02UF4KZ, 02UF37Z, 02UF38Z, 02UF3JZ, 02UG37Z, 02UG3KZ, 02UH37Z, 02UG0JZ, 02UH0JZ, 02UJ0JZ, 02BK0ZZ, 027F3ZZ, 027G3ZZ, 027H3ZZ, 027J3ZZ, 02UG3JZ, 02RF37H, 02RF38H, 02RG3JH, 02RG3KH, 02RH38H, 02RH3KH, 024F07J, 024F08J, 024F0JJ, 024F0KJ, 024G072, 024G082, 024J072, 024J082, 024J0J2, 024J0K2, 02QF0ZJ, 02QG0ZE, 02QG3ZE, 02QG4ZE, 02QJ0ZG, 02QJ3ZG, 02QJ4ZG, 02UF0JJ, |

|  |  |                                                                                                                                                                  |
|--|--|------------------------------------------------------------------------------------------------------------------------------------------------------------------|
|  |  | 02UF0KJ, 02UF37J, 02UF38J,<br>02UF3JJ, 02UF4KJ, 02UG07E,<br>02UG08E, 02UG0JE,<br>02UG0KE, 02UG3JE,<br>02UG3KE, 02UJ0JG,<br>02UJ0KG, X2RF032,<br>X2RF332, X2RF432 |
|--|--|------------------------------------------------------------------------------------------------------------------------------------------------------------------|

*Based on previous studies<sup>1,2</sup>*

**Table 2.** Baseline characteristics in the prognostic score matched cohorts

| Variable                    | Stroke/SE             |                       | Major bleeding        |                       | GI bleeding           |                       | Intracranial bleeding |                       | Death                 |                       |
|-----------------------------|-----------------------|-----------------------|-----------------------|-----------------------|-----------------------|-----------------------|-----------------------|-----------------------|-----------------------|-----------------------|
|                             | Apixaban<br>(n=2,351) | Warfarin<br>(n=7,053) | Apixaban<br>(n=2,351) | Warfarin<br>(n=7,053) | Apixaban<br>(n=2,351) | Warfarin<br>(n=7,053) | Apixaban<br>(n=2,350) | Warfarin<br>(n=7,050) | Apixaban<br>(n=2,351) | Warfarin<br>(n=7,053) |
| <i>Demographics</i>         |                       |                       |                       |                       |                       |                       |                       |                       |                       |                       |
| Age (yrs)                   | 68.87<br>(11.49)      | 68.04<br>(11.90)      | 68.87<br>(11.49)      | 68.21<br>(12.00)      | 68.87<br>(11.49)      | 68.27<br>(12.01)      | 68.87<br>(11.49)      | 68.55<br>(11.73)      | 68.87<br>(11.49)      | 68.14<br>(11.80)      |
| Male                        | 1280 (54.4)           | 3875 (54.9)           | 1280 (54.4)           | 3790 (53.7)           | 1280 (54.4)           | 3830 (54.3)           | 1280 (54.5)           | 3835 (54.4)           | 1280 (54.4)           | 3796 (53.8)           |
| Race                        |                       |                       |                       |                       |                       |                       |                       |                       |                       |                       |
| White                       | 604 (25.7)            | 2103 (29.8)           | 604 (25.7)            | 2080 (29.5)           | 604 (25.7)            | 2033 (28.8)           | 604 (25.7)            | 1969 (27.9)           | 604 (25.7)            | 2138 (30.3)           |
| Black                       | 152 (6.5)             | 315 (4.5)             | 152 (6.5)             | 347 (4.9)             | 152 (6.5)             | 339 (4.8)             | 151 (6.4)             | 298 (4.2)             | 152 (6.5)             | 334 (4.7)             |
| Other                       | 1595 (67.8)           | 4635 (65.7)           | 1595 (67.8)           | 4626 (65.6)           | 1595 (67.8)           | 4681 (66.4)           | 1595 (67.9)           | 4783 (67.8)           | 1595 (67.8)           | 4581 (65.0)           |
| <i>Nephrology care</i>      |                       |                       |                       |                       |                       |                       |                       |                       |                       |                       |
| Time on dialysis            | 656 (27.9)            | 1976 (28.0)           | 656 (27.9)            | 1941 (27.5)           | 656 (27.9)            | 2073 (29.4)           | 655 (27.9)            | 1981 (28.1)           | 656 (27.9)            | 2032 (28.8)           |
| <1 year                     | 240 (10.2)            | 831 (11.8)            | 240 (10.2)            | 831 (11.8)            | 240 (10.2)            | 796 (11.3)            | 240 (10.2)            | 841 (11.9)            | 240 (10.2)            | 802 (11.4)            |
| 1 to <2 years               | 256 (10.9)            | 791 (11.2)            | 256 (10.9)            | 773 (11.0)            | 256 (10.9)            | 752 (10.7)            | 256 (10.9)            | 782 (11.1)            | 256 (10.9)            | 757 (10.7)            |
| 2 to <3 years               | 1199 (51.0)           | 3455 (49.0)           | 1199 (51.0)           | 3508 (49.7)           | 1199 (51.0)           | 3432 (48.7)           | 1199 (51.0)           | 3446 (48.9)           | 1199 (51.0)           | 3462 (49.1)           |
| ≥3 years                    | 416 (17.7)            | 1076 (15.3)           | 416 (17.7)            | 1031 (14.6)           | 416 (17.7)            | 1050 (14.9)           | 416 (17.7)            | 1075 (15.2)           | 416 (17.7)            | 1064 (15.1)           |
| Private insurance           | 656 (27.9)            | 1976 (28.0)           | 656 (27.9)            | 1941 (27.5)           | 656 (27.9)            | 2073 (29.4)           | 655 (27.9)            | 1981 (28.1)           | 656 (27.9)            | 2032 (28.8)           |
| Pre-ESRD nephrology care    |                       |                       |                       |                       |                       |                       |                       |                       |                       |                       |
| None                        | 1012 (43.0)           | 3372 (47.8)           | 1012 (43.0)           | 3370 (47.8)           | 1012 (43.0)           | 3382 (48.0)           | 1011 (43.0)           | 3353 (47.6)           | 1012 (43.0)           | 3308 (46.9)           |
| <6 months                   | 283 (12.0)            | 806 (11.4)            | 283 (12.0)            | 790 (11.2)            | 283 (12.0)            | 765 (10.8)            | 283 (12.0)            | 779 (11.0)            | 283 (12.0)            | 770 (10.9)            |
| 6 to <12 months             | 422 (17.9)            | 1189 (16.9)           | 422 (17.9)            | 1184 (16.8)           | 422 (17.9)            | 1179 (16.7)           | 422 (18.0)            | 1183 (16.8)           | 422 (17.9)            | 1206 (17.1)           |
| ≥12 months                  | 634 (27.0)            | 1686 (23.9)           | 634 (27.0)            | 1709 (24.2)           | 634 (27.0)            | 1727 (24.5)           | 634 (27.0)            | 1735 (24.6)           | 634 (27.0)            | 1769 (25.1)           |
| <i>Comorbidities</i>        |                       |                       |                       |                       |                       |                       |                       |                       |                       |                       |
| Hypertension                | 2342 (99.6)           | 7015 (99.5)           | 2342 (99.6)           | 7018 (99.5)           | 2342 (99.6)           | 7029 (99.7)           | 2341 (99.6)           | 7028 (99.7)           | 2342 (99.6)           | 7025 (99.6)           |
| Cerebrovascular event       | 778 (33.1)            | 2215 (31.4)           | 778 (33.1)            | 2368 (33.6)           | 778 (33.1)            | 2314 (32.8)           | 778 (33.1)            | 2529 (35.9)           | 778 (33.1)            | 2408 (34.1)           |
| Diabetes                    | 1773 (75.4)           | 5163 (73.2)           | 1773 (75.4)           | 5265 (74.6)           | 1773 (75.4)           | 5246 (74.4)           | 1772 (75.4)           | 5272 (74.8)           | 1773 (75.4)           | 5303 (75.2)           |
| Congestive heart failure    | 1868 (79.5)           | 5372 (76.2)           | 1868 (79.5)           | 5470 (77.6)           | 1868 (79.5)           | 5489 (77.8)           | 1867 (79.4)           | 5503 (78.1)           | 1868 (79.5)           | 5505 (78.1)           |
| SCD/VA                      | 279 (11.9)            | 935 (13.3)            | 279 (11.9)            | 935 (13.3)            | 279 (11.9)            | 942 (13.4)            | 279 (11.9)            | 950 (13.5)            | 279 (11.9)            | 968 (13.7)            |
| Peripheral arterial disease | 1084 (46.1)           | 3070 (43.5)           | 1084 (46.1)           | 3242 (46.0)           | 1377 (58.6)           | 4396 (62.3)           | 1377 (58.6)           | 4407 (62.5)           | 1377 (58.6)           | 4359 (61.8)           |
| Smoking                     | 978 (41.6)            | 2736 (38.8)           | 978 (41.6)            | 2712 (38.5)           | 1084 (46.1)           | 3201 (45.4)           | 1084 (46.1)           | 3197 (45.3)           | 1084 (46.1)           | 3171 (45.0)           |

|                                                   |             |             |             |             |             |             |             |             |             |             |
|---------------------------------------------------|-------------|-------------|-------------|-------------|-------------|-------------|-------------|-------------|-------------|-------------|
| Hypothyroidism                                    | 90 (3.8)    | 114 (1.6)   | 90 (3.8)    | 124 (1.8)   | 978 (41.6)  | 2685 (38.1) | 977 (41.6)  | 2745 (38.9) | 978 (41.6)  | 2706 (38.4) |
| Liver disease                                     | 221 (9.4)   | 725 (10.3)  | 221 (9.4)   | 750 (10.6)  | 90 ( 3.8)   | 131 ( 1.9)  | 90 ( 3.8)   | 121 ( 1.7)  | 90 (3.8)    | 123 (1.7)   |
| Obesity                                           | 590 (25.1)  | 1513 (21.5) | 590 (25.1)  | 1497 (21.2) | 221 ( 9.4)  | 689 ( 9.8)  | 221 ( 9.4)  | 725 (10.3)  | 221 (9.4)   | 730 (10.4)  |
| Venous thromboembolism                            | 279 (11.9)  | 1271 (18.0) | 279 (11.9)  | 1325 (18.8) | 590 (25.1)  | 1530 (21.7) | 590 (25.1)  | 1499 (21.3) | 590 (25.1)  | 1509 (21.4) |
| Cancer                                            | 330 (14.0)  | 1086 (15.4) | 330 (14.0)  | 1020 (14.5) | 279 (11.9)  | 1339 (19.0) | 279 (11.9)  | 1266 (18.0) | 279 (11.9)  | 1336 (18.9) |
| Anemia                                            | 2334 (99.3) | 6999 (99.2) | 2334 (99.3) | 7002 (99.3) | 330 (14.0)  | 1076 (15.3) | 330 (14.0)  | 1133 (16.1) | 330 (14.0)  | 1068 (15.1) |
| Myocardial infarction                             | 632 (26.9)  | 1844 (26.1) | 632 (26.9)  | 1925 (27.3) | 2334 (99.3) | 7005 (99.3) | 2333 (99.3) | 6994 (99.2) | 2334 (99.3) | 6993 (99.1) |
| Sleep apnea                                       | 550 (23.4)  | 1466 (20.8) | 550 (23.4)  | 1479 (21.0) | 632 (26.9)  | 1870 (26.5) | 632 (26.9)  | 1981 (28.1) | 632 (26.9)  | 1898 (26.9) |
| Prior major bleeding                              | 217 (9.2)   | 710 (10.1)  | 217 (9.2)   | 768 (10.9)  | 550 (23.4)  | 1458 (20.7) | 550 (23.4)  | 1509 (21.4) | 550 (23.4)  | 1462 (20.7) |
| Prior GI bleeding                                 | 249 (10.6)  | 839 (11.9)  | 249 (10.6)  | 884 (12.5)  | 217 ( 9.2)  | 711 (10.1)  | 217 (9.2)   | 782 (11.1)  | 217 (9.2)   | 718 (10.2)  |
| CHA <sub>2</sub> DS <sub>2</sub> VASc score, mean | 5.27 (1.77) | 5.14 (1.78) | 5.27 (1.77) | 5.26 (1.79) | 249 (10.6)  | 819 (11.6)  | 249 (10.6)  | 861 (12.2)  | 249 (10.6)  | 792 (11.2)  |
| <i>Baseline medications</i>                       |             |             |             |             |             |             |             |             |             |             |
| Statin                                            | 553 (23.5)  | 1699 (24.1) | 553 (23.5)  | 1648 (23.4) | 553 (23.5)  | 1664 (23.6) | 552 (23.5)  | 1697 (24.1) | 553 (23.5)  | 1706 (24.2) |
| Non-statin lipid lowering                         | 44 (1.9)    | 186 (2.6)   | 44 (1.9)    | 193 (2.7)   | 44 ( 1.9)   | 193 ( 2.7)  | 44 ( 1.9)   | 189 ( 2.7)  | 44 ( 1.9)   | 198 ( 2.8)  |
| ACEi                                              | 213 ( 9.1)  | 904 (12.8)  | 213 (9.1)   | 895 (12.7)  | 213 ( 9.1)  | 907 (12.9)  | 212 ( 9.0)  | 878 (12.5)  | 213 ( 9.1)  | 933 (13.2)  |
| Angiotensin receptor blocker                      | 156 ( 6.6)  | 405 ( 5.7)  | 156 (6.6)   | 392 (5.6)   | 156 ( 6.6)  | 369 ( 5.2)  | 156 ( 6.6)  | 402 ( 5.7)  | 156 ( 6.6)  | 400 ( 5.7)  |
| Beta-blocker                                      | 925 (39.3)  | 3013 (42.7) | 925 (39.3)  | 2930 (41.5) | 925 (39.3)  | 2958 (41.9) | 924 (39.3)  | 2942 (41.7) | 925 (39.3)  | 2939 (41.7) |
| Calcium channel blocker                           | 530 (22.5)  | 1651 (23.4) | 530 (22.5)  | 1624 (23.0) | 530 (22.5)  | 1633 (23.2) | 530 (22.6)  | 1645 (23.3) | 530 (22.5)  | 1593 (22.6) |
| Diuretic                                          | 214 (9.1)   | 628 (8.9)   | 214 (9.1)   | 656 (9.3)   | 214 ( 9.1)  | 614 ( 8.7)  | 214 ( 9.1)  | 669 ( 9.5)  | 214 ( 9.1)  | 626 ( 8.9)  |
| Other antihypertensive                            | 332 (14.1)  | 1036 (14.7) | 332 (14.1)  | 1014 (14.4) | 332 (14.1)  | 1002 (14.2) | 331 (14.1)  | 932 (13.2)  | 332 (14.1)  | 1038 (14.7) |
| Antiarrhythmics                                   | 538 (22.9)  | 1512 (21.4) | 538 (22.9)  | 1485 (21.1) | 538 (22.9)  | 1587 (22.5) | 538 (22.9)  | 1585 (22.5) | 538 (22.9)  | 1503 (21.3) |
| Antianginal vasodilator                           | 206 (8.8)   | 623 (8.8)   | 206 (8.8)   | 671 (9.5)   | 206 ( 8.8)  | 641 ( 9.1)  | 206 ( 8.8)  | 726 (10.3)  | 206 ( 8.8)  | 630 ( 8.9)  |
| Antiplatelet                                      | 154 (6.6)   | 493 (7.0)   | 154 (6.6)   | 522 (7.4)   | 154 ( 6.6)  | 533 ( 7.6)  | 154 ( 6.6)  | 552 ( 7.8)  | 154 ( 6.6)  | 565 ( 8.0)  |
| NSAIDs                                            | 32 (1.4)    | 98 (1.4)    | 32 (1.4)    | 108 (1.5)   | 32 ( 1.4)   | 106 ( 1.5)  | 32 ( 1.4)   | 94 ( 1.3)   | 32 ( 1.4)   | 115 ( 1.6)  |
| Insulin                                           | 283 (12.0)  | 888 (12.6)  | 283 (12.0)  | 964 (13.7)  | 283 (12.0)  | 933 (13.2)  | 283 (12.0)  | 987 (14.0)  | 283 (12.0)  | 932 (13.2)  |
| Non-insulin diabetes drug                         | 126 (5.4)   | 358 (5.1)   | 126 (5.4)   | 370 (5.2)   | 126 ( 5.4)  | 353 ( 5.0)  | 125 ( 5.3)  | 342 ( 4.9)  | 126 ( 5.4)  | 352 ( 5.0)  |
| Proton pump inhibitor                             | 408 (17.4)  | 1405 (19.9) | 408 (17.4)  | 1368 (19.4) | 408 (17.4)  | 1362 (19.3) | 408 (17.4)  | 1450 (20.6) | 408 (17.4)  | 1378 (19.5) |
| Antidepressant                                    | 307 (13.1)  | 1082 (15.3) | 307 (13.1)  | 1054 (14.9) | 307 (13.1)  | 1082 (15.3) | 307 (13.1)  | 1078 (15.3) | 307 (13.1)  | 1088 (15.4) |

Categorical variables are shown as n (%). Continuous variables are shown as mean (standard deviation). None of the listed variables had a standardized mean difference >0.2 between the apixaban and warfarin groups. Abbreviations: ESRD, end-stage renal disease; SE, systemic embolism; SCD/VA, sudden cardiac death/ventricular arrhythmia; ACEi, angiotensin converting enzyme inhibitor; NSAIDs, non-steroidal anti-inflammatory drugs

**Table 3.** Baseline characteristics of the warfarin group in the study years 2010-2012 and 2013-2015 (prognostic score matched warfarin cohort for the “death” outcome)

| <b>Variable</b>                 | <b>Overall (n=7,053)</b> | <b>2010-2012<br/>(n=3,131)</b> | <b>2013-2015<br/>(n=3,922)</b> |
|---------------------------------|--------------------------|--------------------------------|--------------------------------|
| <i>Demographics</i>             |                          |                                |                                |
| Age (yrs)                       | 68.14 (11.80)            | 68.00 (11.91)                  | 68.25 (11.70)                  |
| Male                            | 3796 (53.8)              | 1603 (51.2)                    | 2193 (55.9)                    |
| Race                            |                          |                                |                                |
| White                           | 2138 (30.3)              | 988 (31.6)                     | 1150 (29.3)                    |
| Black                           | 334 (4.7)                | 140 (4.5)                      | 194 (4.9)                      |
| Other                           | 4581 (65.0)              | 2003 (64.0)                    | 2578 (65.7)                    |
| <i>Nephrology care</i>          |                          |                                |                                |
| Time on dialysis                |                          |                                |                                |
| <1 year                         | 2032 (28.8)              | 810 (25.9)                     | 1222 (31.2)                    |
| 1 to <2 years                   | 802 (11.4)               | 372 (11.9)                     | 430 (11.0)                     |
| 2 to <3 years                   | 757 (10.7)               | 344 (11.0)                     | 413 (10.5)                     |
| ≥3 years                        | 3462 (49.1)              | 1605 (51.3)                    | 1857 (47.3)                    |
| Private insurance               | 1064 (15.1)              | 434 (13.9)                     | 630 (16.1)                     |
| Pre-ESRD nephrology care        |                          |                                |                                |
| None                            | 3308 (46.9)              | 1612 (51.5)                    | 1696 (43.2)                    |
| <6 months                       | 770 (10.9)               | 314 (10.0)                     | 456 (11.6)                     |
| 6 to <12 months                 | 1206 (17.1)              | 518 (16.5)                     | 688 (17.5)                     |
| ≥12 months                      | 1769 (25.1)              | 687 (21.9)                     | 1082 (27.6)                    |
| <i>Comorbidities</i>            |                          |                                |                                |
| Hypertension                    | 7025 (99.6)              | 3117 (99.6)                    | 3908 (99.6)                    |
| Cerebrovascular event           | 2408 (34.1)              | 1095 (35.0)                    | 1313 (33.5)                    |
| Diabetes                        | 5303 (75.2)              | 2376 (75.9)                    | 2927 (74.6)                    |
| Congestive heart failure        | 5505 (78.1)              | 2483 (79.3)                    | 3022 (77.1)                    |
| SCD/VA                          | 968 (13.7)               | 435 (13.9)                     | 533 (13.6)                     |
| Peripheral arterial disease     | 3171 (45.0)              | 1399 (44.7)                    | 1772 (45.2)                    |
| Smoking*                        | 2706 (38.4)              | 966 (30.9)                     | 1740 (44.4)                    |
| Hypothyroidism                  | 123 (1.7)                | 29 (0.9)                       | 94 (2.4)                       |
| Liver disease                   | 730 (10.4)               | 331 (10.6)                     | 399 (10.2)                     |
| Obesity                         | 1509 (21.4)              | 541 (17.3)                     | 968 (24.7)                     |
| Venous thromboembolism          | 1336 (18.9)              | 648 (20.7)                     | 688 (17.5)                     |
| Cancer                          | 1068 (15.1)              | 460 (14.7)                     | 608 (15.5)                     |
| Anemia                          | 6993 (99.1)              | 3107 (99.2)                    | 3886 (99.1)                    |
| Myocardial infarction           | 1898 (26.9)              | 818 (26.1)                     | 1080 (27.5)                    |
| Sleep apnea                     | 1462 (20.7)              | 575 (18.4)                     | 887 (22.6)                     |
| Prior major bleeding            | 718 (10.2)               | 333 (10.6)                     | 385 (9.8)                      |
| Prior gastrointestinal bleeding | 792 (11.2)               | 389 (12.4)                     | 403 (10.3)                     |

|                                                   |             |             |             |
|---------------------------------------------------|-------------|-------------|-------------|
| CHA <sub>2</sub> DS <sub>2</sub> VASc score, mean | 5.27 (1.77) | 5.33 (1.79) | 5.22 (1.76) |
| <i>Baseline medications</i>                       |             |             |             |
| Statin                                            | 1706 (24.2) | 722 (23.1)  | 984 (25.1)  |
| Non-statin lipid lowering                         | 198 (2.8)   | 101 (3.2)   | 97 (2.5)    |
| ACEi                                              | 933 (13.2)  | 443 (14.1)  | 490 (12.5)  |
| Angiotensin receptor blocker                      | 400 (5.7)   | 177 (5.7)   | 223 (5.7)   |
| Beta-blocker                                      | 2939 (41.7) | 1252 (40.0) | 1687 (43.0) |
| Calcium channel blocker                           | 1593 (22.6) | 689 (22.0)  | 904 (23.0)  |
| Diuretic                                          | 626 (8.9)   | 265 (8.5)   | 361 (9.2)   |
| Other antihypertensive                            | 1038 (14.7) | 465 (14.9)  | 573 (14.6)  |
| Antiarrhythmics                                   | 1503 (21.3) | 700 (22.4)  | 803 (20.5)  |
| Antianginal vasodilator                           | 630 (8.9)   | 277 (8.8)   | 353 (9.0)   |
| Antiplatelet                                      | 565 (8.0)   | 269 (8.6)   | 296 (7.5)   |
| NSAIDs                                            | 115 (1.6)   | 58 (1.9)    | 57 (1.5)    |
| Insulin                                           | 932 (13.2)  | 455 (14.5)  | 477 (12.2)  |
| Non-insulin diabetes drug                         | 352 (5.0)   | 176 (5.6)   | 176 (4.5)   |
| Proton pump inhibitor                             | 1378 (19.5) | 596 (19.0)  | 782 (19.9)  |
| Antidepressant                                    | 1088 (15.4) | 485 (15.5)  | 603 (15.4)  |

Categorical variables are shown as n (%). Continuous variables are shown as mean (standard deviation).

\* Standardized mean difference >0.2 between the 2 groups.

Abbreviations: ESRD, end-stage renal disease; SCD/VA, sudden cardiac death/ventricular arrhythmia; ACEi, angiotensin converting enzyme inhibitor; NSAIDs, non-steroidal anti-inflammatory drugs; SMD, standardized mean difference



**Table 4.** Event rates in the warfarin group in the study years 2010-2012 and 2013-2015 (in prognostic score matched cohorts)

| <b>Outcome</b>        | <b>Overall</b> | <b>2010-2012</b> | <b>2013-2015</b> |
|-----------------------|----------------|------------------|------------------|
| Stroke/SE             | 11.8           | 11.8             | 11.9             |
| Major bleeding        | 22.9           | 22.9             | 22.8             |
| GI bleeding           | 23.4           | 22.7             | 24               |
| Intracranial bleeding | 3.5            | 3.3              | 3.6              |
| Death                 | 24.9           | 25.6             | 24.2             |

Event rates shown per 100 patient-years.

Abbreviations: SE, systemic embolism; GI, gastrointestinal

**Table 5.** Comparison of unmatched apixaban and warfarin groups based on multivariate Cox regression model including anticoagulant drug exposure as one of the predictor variables

| Outcome               | HR (95% CI) for apixaban vs warfarin |                                      | P <sub>int</sub> |
|-----------------------|--------------------------------------|--------------------------------------|------------------|
|                       | Main analysis                        | Multivariate Cox regression analysis |                  |
| Stroke/SE             | 0.88 (0.69-1.12)                     | 0.95 (0.75-1.19)                     | 0.65             |
| Major bleeding        | 0.72 (0.59-0.87)                     | 0.68 (0.57-0.81)                     | 0.67             |
| GI bleeding           | 0.86 (0.72-1.02)                     | 0.89 (0.75-1.05)                     | 0.78             |
| Intracranial bleeding | 0.79 (0.49-1.26)                     | 0.77 (0.49-1.20)                     | 0.94             |
| Death                 | 0.85 (0.71-1.01)                     | 0.86 (0.73-1.01)                     | 0.92             |

Abbreviations: HR, hazard ratio; CI, confidence interval; SE, systemic embolism; GI, gastrointestinal; CVA, cerebrovascular accident; P<sub>int</sub>, P-for-interaction

**Table 6.** Sensitivity analysis excluding apixaban patients who were originally prescribed warfarin and then switched to apixaban

| Outcome               | HR (95% CI) for apixaban vs warfarin |                      | P <sub>int</sub> |
|-----------------------|--------------------------------------|----------------------|------------------|
|                       | Main analysis                        | Sensitivity analysis |                  |
| Stroke/SE             | 0.88 (0.69-1.12)                     | 0.97 (0.73-1.28)     | 0.61             |
| Major bleeding        | 0.72 (0.59-0.87)                     | 0.65 (0.52-0.81)     | 0.50             |
| GI bleeding           | 0.86 (0.72-1.02)                     | 0.91 (0.74-1.12)     | 0.68             |
| Intracranial bleeding | 0.79 (0.49-1.26)                     | 0.67 (0.38-1.19)     | 0.66             |
| Death                 | 0.85 (0.71-1.01)                     | 0.81 (0.66-1.00)     | 0.73             |

Abbreviations: HR, hazard ratio; CI, confidence interval; SE, systemic embolism; GI, gastrointestinal; CVA, cerebrovascular accident; P<sub>int</sub>, P-for-interaction

**Table 7.** Results of subgroup analyses in matched apixaban and warfarin cohorts

| Subgroup                             | HR (95% CI) for apixaban vs warfarin |                  |                  |                  |                  |                  |                       |                  |                  |                  |
|--------------------------------------|--------------------------------------|------------------|------------------|------------------|------------------|------------------|-----------------------|------------------|------------------|------------------|
|                                      | Stroke/SE                            | P <sub>int</sub> | Major bleeding   | P <sub>int</sub> | GI bleeding      | P <sub>int</sub> | Intracranial bleeding | P <sub>int</sub> | Death            | P <sub>int</sub> |
| <b>Age</b>                           |                                      |                  |                  |                  |                  |                  |                       |                  |                  |                  |
| <75 years                            | 0.96 (0.72-1.29)                     | 0.27             | 0.70 (0.55-0.89) | 0.77             | 0.79 (0.62-1.00) | 0.31             | 0.93 (0.52-1.67)      | 0.37             | 0.74 (0.58-0.94) | 0.13             |
| ≥75 years                            | 0.72 (0.47-1.10)                     |                  | 0.74 (0.55-0.99) |                  | 0.95 (0.73-1.23) |                  | 0.59 (0.26-1.31)      |                  | 0.97 (0.75-1.24) |                  |
| <b>Sex</b>                           |                                      |                  |                  |                  |                  |                  |                       |                  |                  |                  |
| Male                                 | 0.89 (0.63-1.26)                     | 0.89             | 0.70 (0.54-0.90) | 0.77             | 0.73 (0.56-0.95) | 0.08             | 1.03 (0.58-1.81)      | 0.16             | 0.73 (0.57-0.93) | 0.08             |
| Female                               | 0.86 (0.62-1.21)                     |                  | 0.74 (0.56-0.98) |                  | 1.00 (0.79-1.27) |                  | 0.49 (0.21-1.15)      |                  | 0.99 (0.78-1.27) |                  |
| <b>Diabetes</b>                      |                                      |                  |                  |                  |                  |                  |                       |                  |                  |                  |
| Yes                                  | 0.89 (0.68-1.16)                     | 0.71             | 0.73 (0.59-0.91) | 0.67             | 0.92 (0.76-1.13) | 0.13             | 0.86 (0.51-1.45)      | 0.53             | 0.82 (0.68-1.00) | 0.51             |
| No                                   | 0.79 (0.44-1.40)                     |                  | 0.66 (0.44-0.99) |                  | 0.66 (0.45-0.97) |                  | 0.59 (0.21-1.68)      |                  | 0.94 (0.66-1.35) |                  |
| <b>Prior CVA</b>                     |                                      |                  |                  |                  |                  |                  |                       |                  |                  |                  |
| Yes                                  | 0.76 (0.53-1.08)                     | 0.31             | 0.84 (0.63-1.12) | 0.16             | 1.00 (0.76-1.30) | 0.15             | 0.72 (0.34-1.53)      | 0.74             | 0.88 (0.66-1.16) | 0.75             |
| No                                   | 0.98 (0.70-1.37)                     |                  | 0.64 (0.50-0.82) |                  | 0.77 (0.61-0.97) |                  | 0.85 (0.46-1.54)      |                  | 0.83 (0.67-1.04) |                  |
| <b>Prior major bleeding</b>          |                                      |                  |                  |                  |                  |                  |                       |                  |                  |                  |
| Yes                                  | 1.41 (0.80-2.50)                     | 0.08             | 0.89 (0.57-1.39) | 0.34             | 1.06 (0.70-1.59) | 0.29             | 1.27 (0.42-3.84)      | 0.37             | 1.05 (0.67-1.65) | 0.41             |
| No                                   | 0.80 (0.61-1.05)                     |                  | 0.70 (0.57-0.86) |                  | 0.83 (0.68-1.01) |                  | 0.73 (0.44-1.23)      |                  | 0.82 (0.68-0.99) |                  |
| <b>Obesity</b>                       |                                      |                  |                  |                  |                  |                  |                       |                  |                  |                  |
| Yes                                  | 0.93 (0.61-1.43)                     | 0.67             | 0.65 (0.43-0.99) | 0.59             | 0.78 (0.54-1.14) | 0.54             | 0.40 (0.12-1.34)      | 0.21             | 0.83 (0.58-1.20) | 0.91             |
| No                                   | 0.83 (0.62-1.12)                     |                  | 0.74 (0.60-0.92) |                  | 0.89 (0.73-1.08) |                  | 0.93 (0.56-1.55)      |                  | 0.85 (0.70-1.04) |                  |
| <b>Dialysis modality</b>             |                                      |                  |                  |                  |                  |                  |                       |                  |                  |                  |
| Hemodialysis                         | 0.85 (0.66-1.09)                     | 0.36             | 0.73 (0.60-0.88) | 0.50             | 0.84 (0.70-1.00) | 0.30             | 0.84 (0.52-1.34)      | n/a*             | 0.83 (0.70-1.00) | 0.62             |
| Peritoneal dialysis                  | 1.26 (0.57-2.82)                     |                  | 0.54 (0.23-1.29) |                  | 1.19 (0.63-2.26) |                  | n/a*                  |                  | 0.98 (0.52-1.83) |                  |
| <b>Interacting drugs<sup>†</sup></b> |                                      |                  |                  |                  |                  |                  |                       |                  |                  |                  |
| Group 1                              | 0.97 (0.51-1.83)                     | 0.71             | 0.94 (0.63-1.40) | 0.31             | 1.07 (0.74-1.54) | 0.27             | 0.84 (0.29-2.47)      | 0.97             | 1.22 (0.85-1.76) | 0.07             |
| Group 2                              | 1.02 (0.61-1.69)                     |                  | 0.73 (0.48-1.13) |                  | 0.67 (0.43-1.04) |                  | 0.86 (0.33-2.26)      |                  | 0.67 (0.44-1.02) |                  |
| None                                 | 0.81 (0.60-1.10)                     |                  | 0.65 (0.50-0.83) |                  | 0.85 (0.68-1.07) |                  | 0.75 (0.40-1.39)      |                  | 0.80 (0.64-1.00) |                  |

HR and 95% CIs were obtained from univariable Cox regression analyses with anticoagulant drug exposure as the only predictor variable.

\*too few events in this subgroup precluding effect estimate calculation

†Patients were categorized into 3 groups depending on whether they had concomitant prescriptions at time 0 for medications that have been recently shown to (i) increase bleeding risks with DOACs (amiodarone, fluconazole, rifampin, phenytoin) (Group 1); (ii) decrease bleeding risks (atorvastatin, digoxin, erythromycin, clarithromycin) (Group 2); or (iii) none of these medications<sup>3</sup>.

Abbreviations: HR, hazard ratio; CI, confidence interval; SE, systemic embolism; GI, gastrointestinal; CVA, cerebrovascular accident; P<sub>int</sub>, P-for-interaction

**Table 8.** Baseline characteristics of patients prescribed apixaban 5 mg and apixaban 2.5 mg

| Variable                    | Overall (n=2,351) | Apixaban 5 mg (n=1,034) | Apixaban 2.5 mg (n=1,317) |
|-----------------------------|-------------------|-------------------------|---------------------------|
| <i>Demographics</i>         |                   |                         |                           |
| Age (yrs)*                  | 68.87 (11.49)     | 65.16 (10.14)           | 71.79 (11.65)             |
| Male                        | 1,280 (54.4)      | 616 (59.6)              | 664 (50.4)                |
| Race                        |                   |                         |                           |
| White                       | 1,595 (67.8)      | 696 (67.3)              | 899 (68.3)                |
| Black                       | 604 (25.7)        | 290 (28.0)              | 314 (23.8)                |
| Other                       | 152 (6.5)         | 48 (4.6)                | 104 (7.9)                 |
| <i>Nephrology care</i>      |                   |                         |                           |
| Dialysis modality           |                   |                         |                           |
| Hemodialysis                | 2,216 (94.3)      | 977 (94.5)              | 1239 (94.1)               |
| Peritoneal dialysis         | 135 (5.7)         | 57 (5.5)                | 78 (5.9)                  |
| Time on dialysis            |                   |                         |                           |
| <1 year                     | 656 (27.9)        | 252 (24.4)              | 404 (30.7)                |
| 1 to <2 years               | 240 (10.2)        | 111 (10.7)              | 129 (9.8)                 |
| 2 to <3 years               | 256 (10.9)        | 107 (10.3)              | 149 (11.3)                |
| ≥3 years                    | 1,199 (51.0)      | 564 (54.5)              | 635 (48.2)                |
| Private insurance           | 416 (17.7)        | 193 (18.7)              | 223 (16.9)                |
| Pre-ESRD nephrology care    |                   |                         |                           |
| None                        | 1,012 (43.0)      | 464 (44.9)              | 548 (41.6)                |
| <6 months                   | 283 (12.0)        | 114 (11.0)              | 169 (12.8)                |
| 6 to <12 months             | 422 (17.9)        | 182 (17.6)              | 240 (18.2)                |
| ≥12 months                  | 634 (27.0)        | 274 (26.5)              | 360 (27.3)                |
| <i>Comorbidities</i>        |                   |                         |                           |
| Hypertension                | 2,342 (99.6)      | 1,032 (99.8)            | 1,310 (99.5)              |
| Cerebrovascular event       | 778 (33.1)        | 312 (30.2)              | 466 (35.4)                |
| Diabetes                    | 1,773 (75.4)      | 815 (78.8)              | 958 (72.7)                |
| Congestive heart failure    | 1,868 (79.5)      | 815 (78.8)              | 1,053 (80.0)              |
| SCD/VA                      | 279 (11.9)        | 135 (13.1)              | 144 (10.9)                |
| Peripheral arterial disease | 1,084 (46.1)      | 476 (46.0)              | 608 (46.2)                |
| Smoking                     | 978 (41.6)        | 469 (45.4)              | 509 (38.6)                |
| Hypothyroidism              | 90 (3.8)          | 40 (3.9)                | 50 (3.8)                  |
| Liver disease               | 221 (9.4)         | 96 (9.3)                | 125 (9.5)                 |
| Obesity*                    | 590 (25.1)        | 336 (32.5)              | 254 (19.3)                |
| Venous thromboembolism      | 279 (11.9)        | 123 (11.9)              | 156 (11.8)                |
| Cancer                      | 330 (14.0)        | 120 (11.6)              | 210 (15.9)                |
| Anemia                      | 2,334 (99.3)      | 1,025 (99.1)            | 1,309 (99.4)              |
| Myocardial infarction       | 632 (26.9)        | 302 (29.2)              | 330 (25.1)                |

|                                                    |             |             |             |
|----------------------------------------------------|-------------|-------------|-------------|
| Sleep apnea*                                       | 550 (23.4)  | 296 (28.6)  | 254 (19.3)  |
| Prior major bleeding                               | 217 (9.2)   | 79 (7.6)    | 138 (10.5)  |
| Prior gastrointestinal bleeding                    | 249 (10.6)  | 94 (9.1)    | 155 (11.8)  |
| CHA <sub>2</sub> DS <sub>2</sub> VASc score, mean* | 5.27 (1.77) | 4.92 (1.71) | 5.54 (1.77) |
| <i>Baseline medications</i>                        |             |             |             |
| Statin                                             | 553 (23.5)  | 250 (24.2)  | 303 (23.0)  |
| Non-statin lipid lowering                          | 44 (1.9)    | 20 (1.9)    | 24 (1.8)    |
| ACEi                                               | 213 (9.1)   | 104 (10.1)  | 109 (8.3)   |
| Angiotensin receptor blocker                       | 156 (6.6)   | 64 (6.2)    | 92 (7.0)    |
| Beta-blocker                                       | 925 (39.3)  | 413 (39.9)  | 512 (38.9)  |
| Calcium channel blocker                            | 530 (22.5)  | 231 (22.3)  | 299 (22.7)  |
| Diuretic                                           | 214 (9.1)   | 80 (7.7)    | 134 (10.2)  |
| Other antihypertensive                             | 332 (14.1)  | 156 (15.1)  | 176 (13.4)  |
| Antiarrhythmics                                    | 538 (22.9)  | 243 (23.5)  | 295 (22.4)  |
| Antianginal vasodilator                            | 206 (8.8)   | 94 (9.1)    | 112 (8.5)   |
| Antiplatelet                                       | 154 (6.6)   | 65 (6.3)    | 89 (6.8)    |
| NSAIDs                                             | 32 (1.4)    | 19 (1.8)    | 13 (1.0)    |
| Insulin                                            | 283 (12.0)  | 134 (13.0)  | 149 (11.3)  |
| Non-insulin diabetes drug                          | 126 (5.4)   | 62 (6.0)    | 64 (4.9)    |
| Proton pump inhibitor                              | 408 (17.4)  | 172 (16.6)  | 236 (17.9)  |
| Antidepressant                                     | 307 (13.1)  | 138 (13.3)  | 169 (12.8)  |

Categorical variables are shown as n (%). Continuous variables are shown as mean (standard deviation).

\* Standardized mean difference >0.2 between the 2 groups.

Abbreviations: ESRD, end-stage renal disease; SCD/VA, sudden cardiac death/ventricular arrhythmia; ACEi, angiotensin converting enzyme inhibitor; NSAIDs, non-steroidal anti-inflammatory drugs; SMD, standardized mean difference

**Table 9.** Event rates in the matched dose-specific apixaban and warfarin cohorts

|                               | <b>Overall<br/>(n=4,136)</b> | <b>Apixaban 5 mg<br/>(n=1,034)</b>   | <b>Warfarin<br/>(n=3,102)</b> |
|-------------------------------|------------------------------|--------------------------------------|-------------------------------|
| <b>Stroke/SE</b>              |                              |                                      |                               |
| N events                      | 186                          | 26                                   | 160                           |
| Event rate per 100 PY         | 11.3                         | 8.8                                  | 11.8                          |
| <b>Major bleeding</b>         |                              |                                      |                               |
| N events                      | 355                          | 54                                   | 301                           |
| Event rate per 100 PY         | 21.3                         | 18.3                                 | 21.9                          |
| <b>GI bleeding</b>            |                              |                                      |                               |
| N events                      | 346                          | 70                                   | 276                           |
| Event rate per 100 PY         | 21.4                         | 23.9                                 | 20.8                          |
| <b>Intracranial bleeding*</b> |                              |                                      |                               |
| N events                      | 61                           | 7                                    | 54                            |
| Event rate per 100 PY         | 3.6                          | 2.3                                  | 3.9                           |
| <b>Death</b>                  |                              |                                      |                               |
| N events                      | 358                          | 48                                   | 310                           |
| Event rate per 100 PY         | 21.5                         | 16.0                                 | 22.8                          |
|                               |                              |                                      |                               |
|                               | <b>Overall<br/>(n=5,268)</b> | <b>Apixaban 2.5 mg<br/>(n=1,317)</b> | <b>Warfarin<br/>(n=3,951)</b> |
| <b>Stroke/SE</b>              |                              |                                      |                               |
| N events                      | 268                          | 55                                   | 213                           |
| Event rate per 100 PY         | 12.4                         | 15.3                                 | 11.8                          |
| <b>Major bleeding</b>         |                              |                                      |                               |
| N events                      | 499                          | 75                                   | 424                           |
| Event rate per 100 PY         | 23.9                         | 20.8                                 | 24.6                          |
| <b>GI bleeding</b>            |                              |                                      |                               |
| N events                      | 491                          | 85                                   | 406                           |
| Event rate per 100 PY         | 24.2                         | 23.7                                 | 24.3                          |
| <b>Intracranial bleeding</b>  |                              |                                      |                               |
| N events                      | 67                           | 14                                   | 53                            |
| Event rate per 100 PY         | 3.2                          | 3.8                                  | 3.0                           |
| <b>Death</b>                  |                              |                                      |                               |
| N events                      | 532                          | 111                                  | 421                           |
| Event rate per 100 PY         | 25.5                         | 29.9                                 | 24.6                          |

\*the matched cohorts for this outcome included 1,033 apixaban and 3,099 warfarin patients (n=4,132 total)

Abbreviations: SE, systemic embolism; PY, patient-years; GI, gastrointestinal



**Table 10.** Multivariate Cox regression analyses restricted to the apixaban patients and including the apixaban dose as a predictor variable

| <b>Outcome</b>        | <b>HR (95% CI)<br/>for apixaban 5 mg vs 2.5 mg</b> | <b>P-value</b> |
|-----------------------|----------------------------------------------------|----------------|
| Stroke/SE             | 0.61 (0.37-0.98)                                   | 0.04           |
| Major bleeding        | 0.98 (0.68-1.42)                                   | 0.93           |
| GI bleeding           | 1.17 (0.84-1.63)                                   | 0.37           |
| Intracranial bleeding | 0.65 (0.25-1.67)                                   | 0.37           |
| Death                 | 0.64 (0.45-0.92)                                   | 0.01           |

Model covariates: apixaban dose, age, sex, prior CVA, prior major bleeding.

Abbreviations: HR, hazard ratio; CI, confidence interval; SE, systemic embolism; GI, gastrointestinal

**Figure 1.** Flowchart of the cohort creation

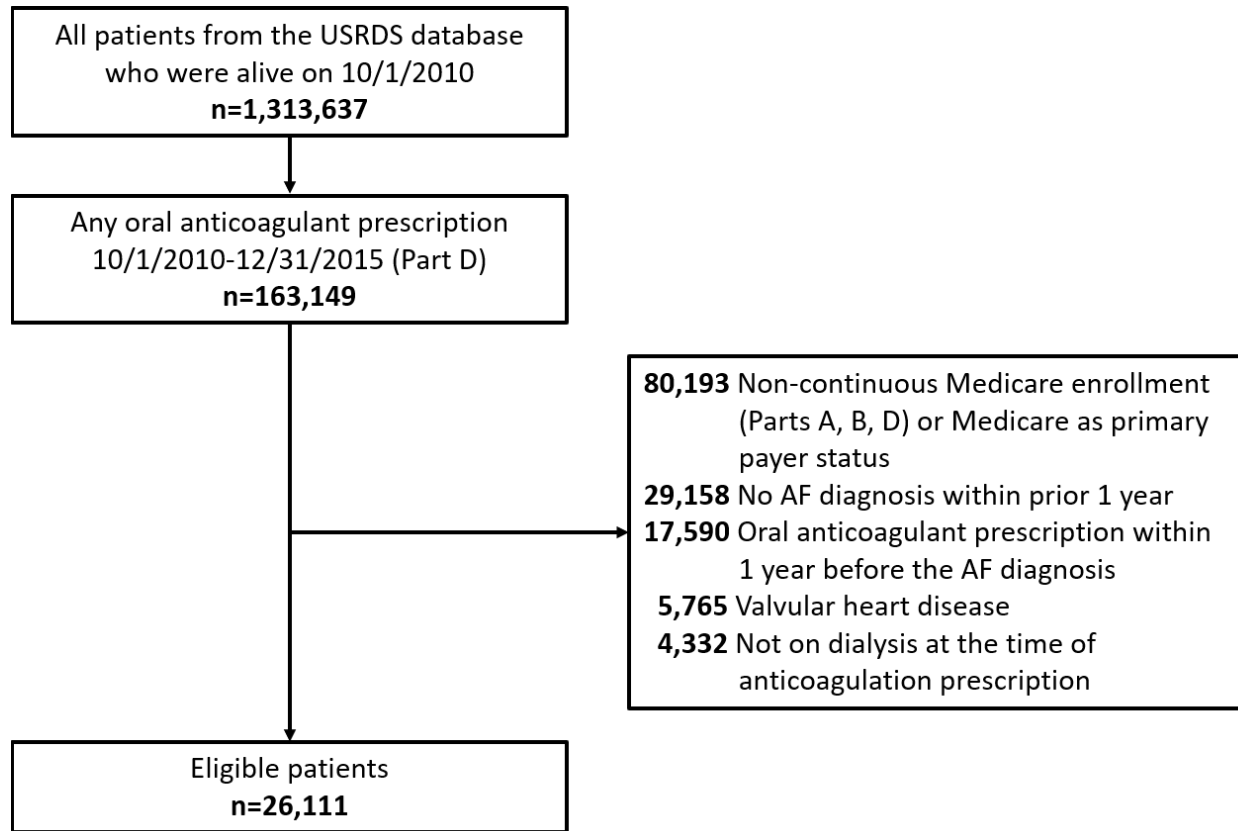

**Figure 2.** Distribution of prognostic scores for each outcome in the apixaban and warfarin cohorts before and after matching

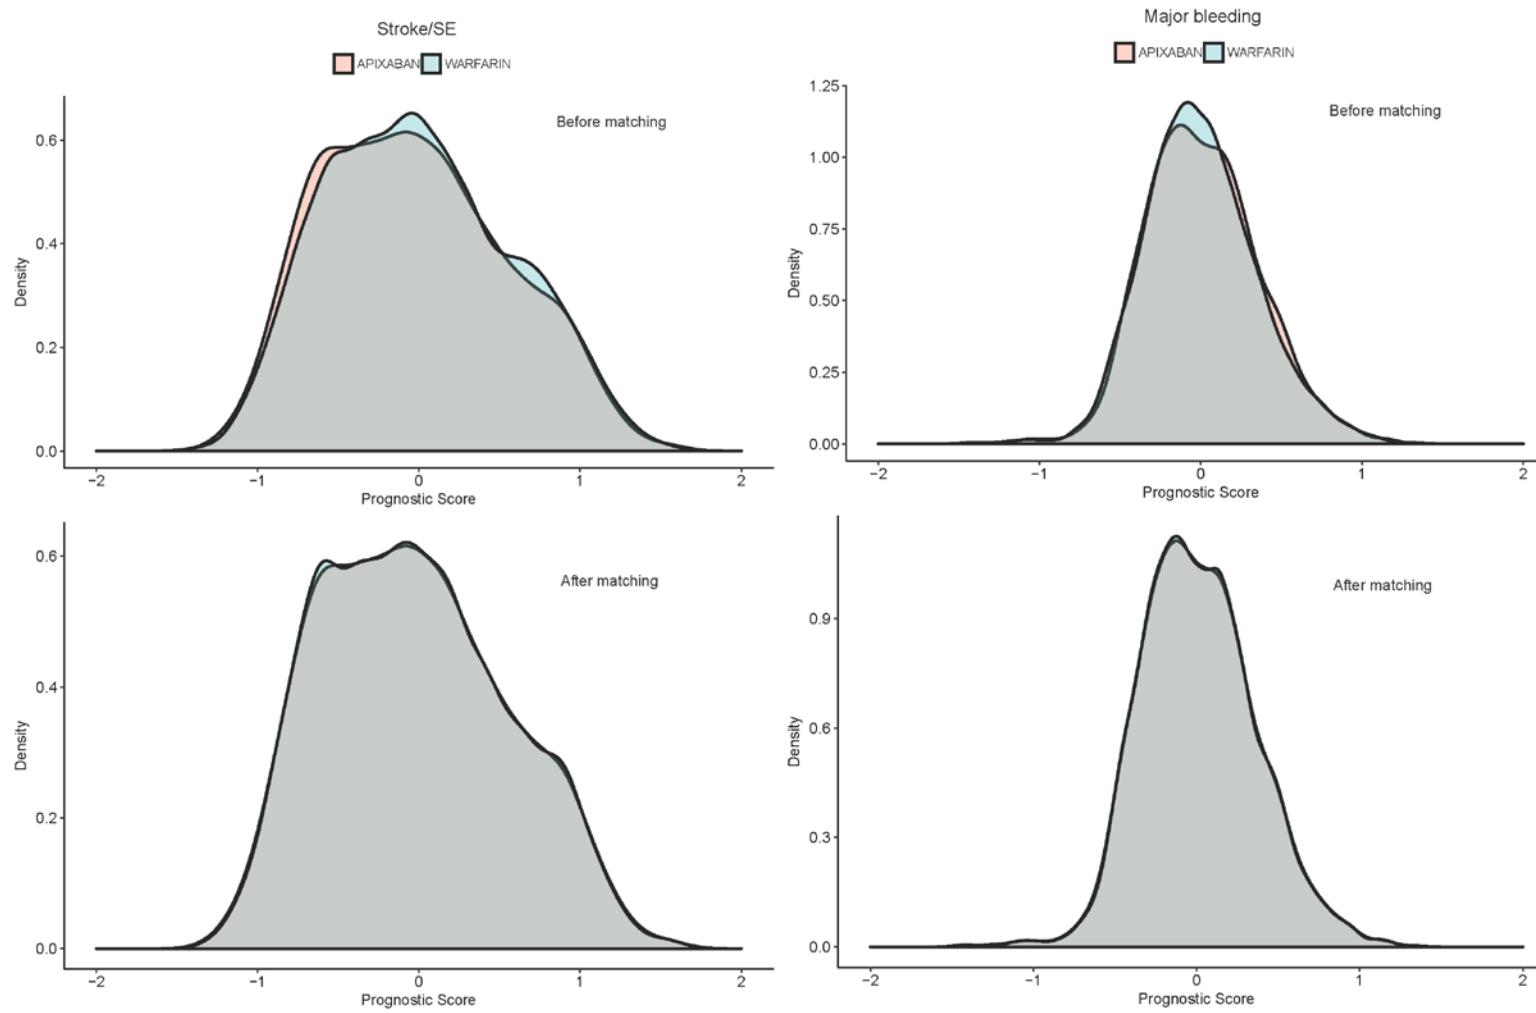

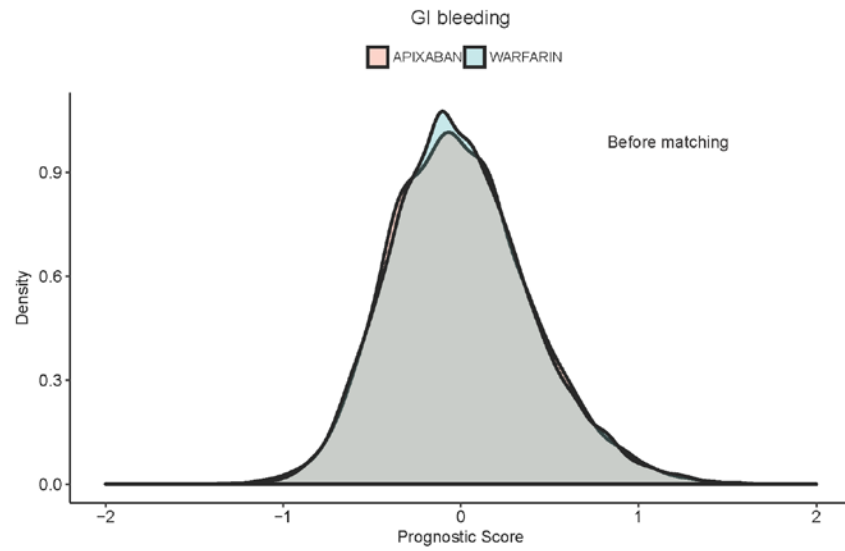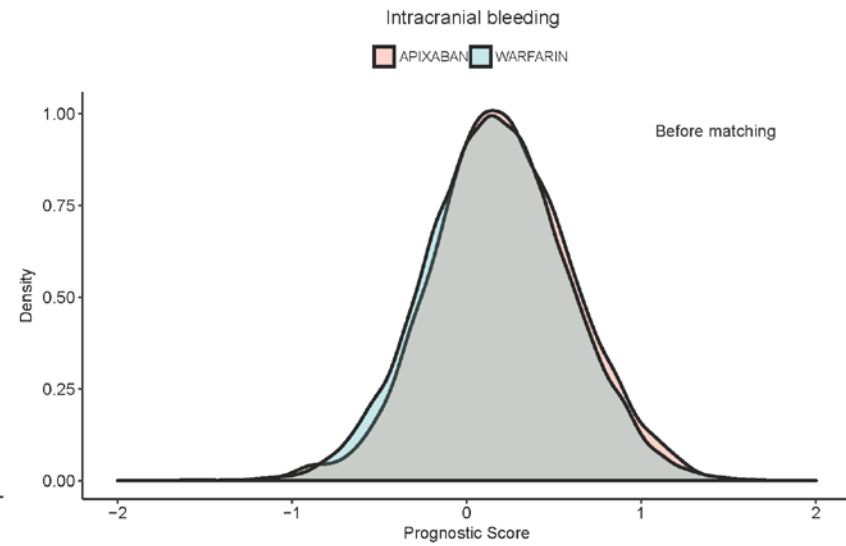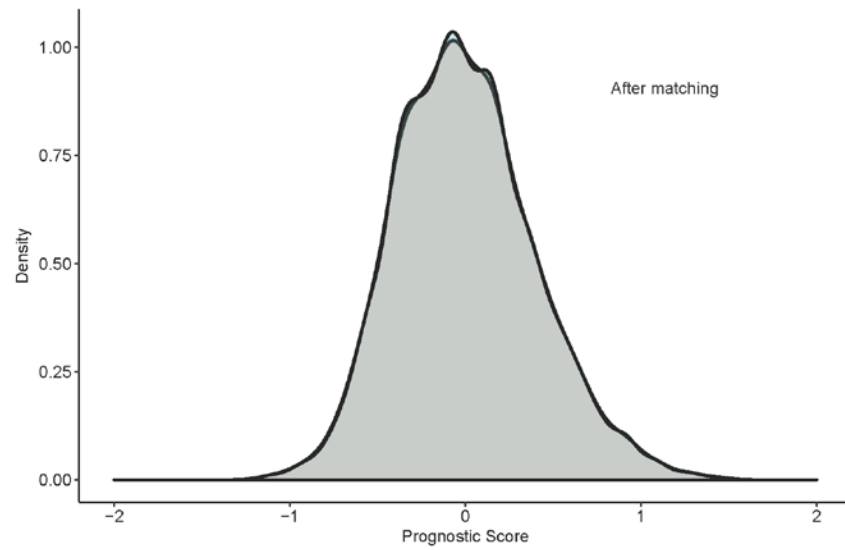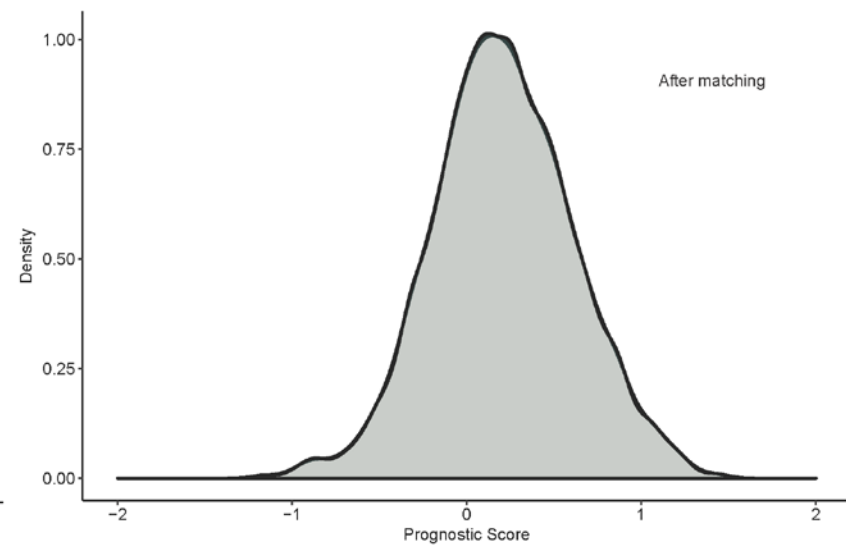

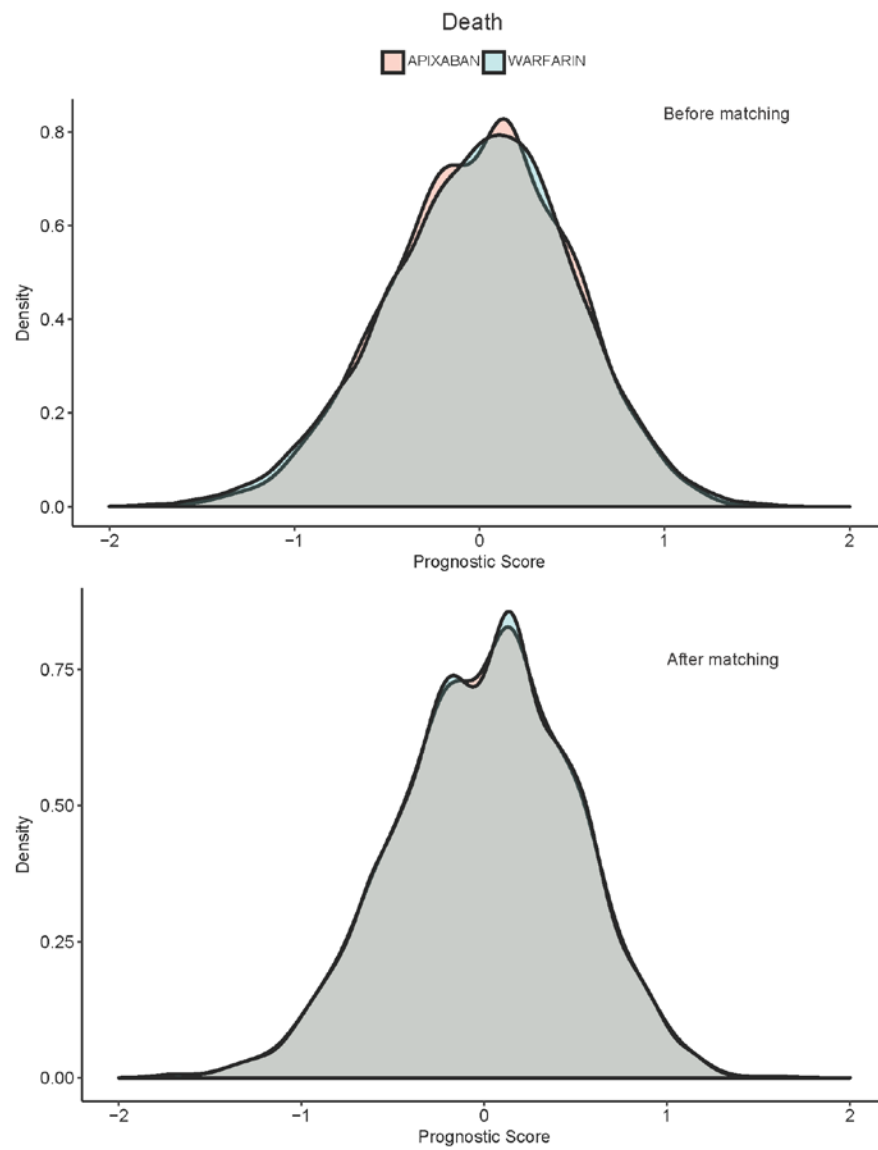

## References

1. Cunningham A, Stein CM, Chung CP, Daugherty JR, Smalley WE, Ray WA. An automated database case definition for serious bleeding related to oral anticoagulant use. *Pharmacoepidemiol Drug Saf.* 2011;20(6):560-566.
2. Yao X, Shah ND, Sangaralingham LR, Gersh BJ, Noseworthy PA. Non-Vitamin K Antagonist Oral Anticoagulant Dosing in Patients With Atrial Fibrillation and Renal Dysfunction. *J Am Coll Cardiol.* 2017;69(23):2779-2790.
3. Chang SH, Chou IJ, Yeh YH, et al. Association Between Use of Non-Vitamin K Oral Anticoagulants With and Without Concurrent Medications and Risk of Major Bleeding in Nonvalvular Atrial Fibrillation. *Jama.* 2017;318(13):1250-1259.
